# Supplementary material
Source: publisher site journal article supplement (https://www.dovepress.com/article/386299)
Supplement: Supplementary file 1 [file get_supplementary_file.php]

**Supplementary table 1 |** Distribution of participants’ general characteristics according to sleep latency

| Variable | | Short sleep latency (≤30min) | Long sleep latency (＞30min) | T/χ2 | P |
| --- | --- | --- | --- | --- | --- |
| Gender | |  |  | 6.54 | 0.011 |
|  | Male | 138(82.10) | 30(17.90) |  |  |
|  | Female | 78(69.00) | 35(31.00) |  |  |
| Age | | 49.03±12.07 | 52.83±10.62 | -2.29 | 0.023 |
| Marriage | |  |  | 5.28 | 0.071 |
|  | Unmarried | 16(100.00) | 0(0.00) |  |  |
|  | Married with a spouse | 193(75.70) | 62(24.30) |  |  |
|  | Divorced or widowed | 7(70.00) | 3(30.00) |  |  |
| Education | |  |  | 7.31 | 0.026 |
|  | Junior high school and below | 82(70.70) | 34(29.30) |  |  |
|  | High school or junior college | 70(76.10) | 22(23.90) |  |  |
|  | College and above | 64(87.70) | 9(12.30) |  |  |
| Monthly income (RMB) | |  |  | 11.96 | 0.003 |
|  | <5000 | 63(64.90) | 34(35.10) |  |  |
|  | 5000-10000 | 78(82.10) | 17(17.90) |  |  |
|  | >10000 | 75(84.30) | 14(15.70) |  |  |
| Smoke | |  |  | 1.70 | 0.193 |
|  | No | 159(75.00) | 53(25.00) |  |  |
|  | Yes | 57(82.60) | 12(17.40) |  |  |
| Drink | |  |  | 1.05 | 0.306 |
|  | No | 138(75.00) | 46(25.00) |  |  |
|  | Yes | 78(80.40) | 19(19.60) |  |  |
| Treatment | |  |  | 13.21 | 0.001 |
|  | Oral medicine | 58(64.40) | 32(35.60) |  |  |
|  | Oral medicine and insulin | 26(74.30) | 9(25.70) |  |  |
|  | Oral medicine and GLP-1RA | 132(84.60) | 24(15.40) |  |  |
| Years of diabetes | |  |  | 0.67 | 0.412 |
|  | ≤5 | 148(78.30) | 41(21.70) |  |  |
|  | ＞5 | 68(73.90) | 24(26.10) |  |  |
| Complications | |  |  | 0.34 | 0.563 |
|  | No | 167(77.70) | 48(22.30) |  |  |
|  | Yes | 49(74.20) | 17(25.80) |  |  |
| Depression (Score) | |  |  | 6.51 | 0.011 |
|  | No | 153(81.40) | 35(18.60) |  |  |
|  | Yes | 63(67.70) | 30(32.30) |  |  |
| Anxiety (Score) | |  |  | 1.80 | 0.180 |
|  | No | 176(78.40) | 48(21.40) |  |  |
|  | Yes | 40(70.20) | 17(29.80) |  |  |
| SF12 (Score) | |  |  | 3.55 | 0.059 |
|  | Good quality of life | 144(80.40) | 35(19.60) |  |  |
|  | Poor quality of life | 72(70.60) | 30(29.40) |  |  |
| PSQI (Score) | | 5.52±2.42 | 10.31±3.06 | -11.57 | <0.001 |
|  | Subjective sleep quality (C1) | 0.81±0.61 | 1.52±0.71 | -7.29 | <0.001 |
|  | Sleep latency (C2) | 0.37±0.63 | 2.63±0.55 | -26.32 | <0.001 |
|  | Sleep duration (C3) | 0.91±0.65 | 1.18±0.81 | -2.53 | 0.013 |
|  | Habitual sleep efficiency (C4) | 0.87±1.00 | 1.72±1.17 | -5.36 | <0.001 |
|  | Sleep disturbances (C5) | 1.13±0.50 | 1.33±0.47 | -2.85 | 0.005 |
|  | Use of sleep medication (C6) | 0.03±0.30 | 0.22±0.63 | -2.29 | 0.025 |
|  | Daytime dysfunction (C7) | 1.40±0.91 | 1.72±0.93 | -2.50 | 0.013 |
| Sleep efficiency (%) | |  |  | 14.84 | <0.001 |
|  | ≥85 | 101(88.60) | 13(11.40) |  |  |
|  | ＜85 | 115(68.90) | 52(31.10) |  |  |
| Sleep duration (hour) | |  |  | 6.72 | 0.010 |
|  | ≥6 | 186(79.80) | 47(20.20) |  |  |
|  | ＜6 | 30(62.50) | 18(37.50) |  |  |
| IPAQ (Score) | |  |  | 1.528 | 0.466 |
|  | Low PA intensity | 110(78.00) | 31(22.00) |  |  |
|  | Medium PA intensity | 95(77.20) | 28(22.80) |  |  |
|  | High PA intensity | 11(64.70) | 6(35.30) |  |  |
| BMI (kg/m2) | |  |  | 11.80 | 0.003 |
|  | 18.5-23.9 | 21(56.80) | 16(43.20) |  |  |
|  | 24-27.9 | 115(76.70) | 35(23.30) |  |  |
|  | ≥28 | 79(84.90) | 14(15.10) |  |  |
| WC (cm) | | 94.38±7.71 | 91.60±7.57 | 2.56 | 0.011 |
| HbA1c (%) | |  |  | 0.21 | 0.644 |
|  | ＜7 | 111(75.50) | 36(24.50) |  |  |
|  | ≥7 | 102(77.90) | 29(22.10) |  |  |
| SBP (mmHg) | | 136.45±15.84 | 141.22±19.41 | -2.01 | 0.045 |
|  | |  |  |  |  |
| DBP (mmHg) | | 82.53±10.67 | 80.45±10.66 | 1.38 | 0.168 |
| FPG (mmol/L) | | 8.23±3.44 | 8.18±2.96 | 0.10 | 0.921 |
| TG (mmol/L) | | 2.11±1.88 | 1.93±1.58 | 0.72 | 0.475 |
| TC (mmol/L) | | 4.94±1.36 | 4.83±1.29 | 0.57 | 0.572 |
| HDL-C (mmol/L) | | 1.17±0.25 | 1.20±0.22 | -0.78 | 0.439 |
| LDL-C (mmol/L) | | 3.11±0.97 | 3.01±0.98 | 0.71 | 0.478 |

GLP-1RA= Glp-1 receptor agonist; SF12= Short Form 12; PSQI= Pittsburgh Sleep Quality Index; BMI=Body mass index; WC= Waist circumference; SBP=Systolic blood pressure; DBP=Diastolic blood pressure; FPG=Fasting plasma glucose; TG= Triglycerides; TC= Total cholesterol; HDL-C= High-density lipoprotein cholesterol; LDL-C= Low-density lipoprotein cholesterol; RMB=Ren Min Bi; IPAQ=International Physical Activity Questionnaire; PA=Physical activity

Statistical test: Independent Two-sample T-test and Chi-square Test

**Supplementary table 2 |** Distribution of participants’ general characteristics according to sleep duration

| Variable | | Long sleep duration  (≥6h) | Short sleep duration  (＜6h) | T/χ2 | P |
| --- | --- | --- | --- | --- | --- |
| Gender | |  |  | 1.14 | 0.286 |
|  | Male | 136(81.00) | 32(19.00) |  |  |
|  | Female | 97(85.80) | 16(14.20) |  |  |
| Age | | 48.85±11.51 | 55.08±12.14 | -3.39 | 0.001 |
| Marriage | |  |  | 3.71 | 0.156 |
|  | Unmarried | 15(93.80) | 1(6.30) |  |  |
|  | Married with a spouse | 208(81.60) | 47(18.40) |  |  |
|  | Divorced or widowed | 10(100.00) | 0(0.00) |  |  |
| Education | |  |  | 2.27 | 0.321 |
|  | Junior high school and below | 92(79.30) | 24(20.70) |  |  |
|  | High school or junior college | 77(83.70) | 15(16.30) |  |  |
|  | College and above | 64(87.70) | 9(12.30) |  |  |
| Monthly income (RMB） | |  |  | 0.02 | 0.990 |
|  | <5000 | 80(82.50) | 17(17.50) |  |  |
|  | 5000-10000 | 79(83.20) | 16(16.80) |  |  |
|  | >10000 | 74(83.10) | 15(16.90) |  |  |
| Smoke | |  |  | 1.05 | 0.305 |
|  | No | 173(81.60) | 39(18.40) |  |  |
|  | Yes | 60(87.00) | 9(13.00) |  |  |
| Drink | |  |  | 0.66 | 0.418 |
|  | No | 155(84.20) | 29(15.80) |  |  |
|  | Yes | 78(80.40) | 19(19.60) |  |  |
| Treatment | |  |  | 0.86 | 0.651 |
|  | Oral medicine | 72(80.00) | 18(20.00) |  |  |
|  | Oral medicine and insulin | 29(82.90) | 6(17.10) |  |  |
|  | Oral medicine and GLP-1RA | 132(84.70) | 24(15.40) |  |  |
| Years of diabetes | |  |  | 1.23 | 0.267 |
|  | ≤5 | 160(84.70) | 29(15.30) |  |  |
|  | ＞5 | 73(79.30) | 19(20.70) |  |  |
| Complications | |  |  | 0.72 | 0.395 |
|  | No | 176(81.90) | 39(18.10) |  |  |
|  | Yes | 57(86.40) | 9(13.60) |  |  |
| Depression (Score) | |  |  | 5.74 | 0.017 |
|  | No | 163(86.70) | 25(13.30) |  |  |
|  | Yes | 70(75.30) | 23(24.70) |  |  |
| Anxiety (Score) | |  |  | 0.80 | 0.372 |
|  | No | 188(83.90) | 36(16.10) |  |  |
|  | Yes | 45(78.90) | 12(21.10) |  |  |
| SF12 (Score) | |  |  | 0.04 | 0.849 |
|  | Good quality of life | 149(83.20) | 30(16.80) |  |  |
|  | Poor quality of life | 84(82.40) | 18(17.60) |  |  |
| PSQI (Score) | | 5.87±2.77 | 10.31±3.08 | -9.94 | <0.001 |
|  | Subjective sleep quality (C1) | 0.88±0.65 | 1.44±0.74 | -4.81 | <0.001 |
|  | Sleep latency (C2) | 0.79±1.06 | 1.40±1.33 | -2.98 | 0.004 |
|  | Sleep duration (C3) | 0.73±0.45 | 2.17±0.38 | -23.34 | <0.001 |
|  | Habitual sleep efficiency (C4) | 0.82±0.96 | 2.23±0.97 | -9.18 | <0.001 |
|  | Sleep disturbances (C5) | 1.16±0.49 | 1.29±0.50 | -1.74 | 0.084 |
|  | Use of sleep medication (C6) | 0.08±0.42 | 0.06±0.32 | 0.23 | 0.818 |
|  | Daytime dysfunction (C7) | 1.42±0.92 | 1.73±0.94 | -2.12 | 0.035 |
| Sleep latency (min) | |  |  | 6.72 | 0.010 |
|  | ≤30 | 186(86.10) | 30(13.90) |  |  |
|  | ＞30 | 47(72.30) | 18(27.70) |  |  |
| Sleep efficiency (%) | |  |  | 28.28 | <0.001 |
|  | ≥85 | 111(97.40) | 3(2.60) |  |  |
|  | ＜85 | 122(73.10) | 45(26.90) |  |  |
| IPAQ (Score) | |  |  | 1.848 | 0.397 |
|  | Low PA intensity | 121(85.80) | 20(14.20) |  |  |
|  | Medium PA intensity | 99(80.50) | 24(19.50) |  |  |
|  | High PA intensity | 13(76.50) | 4(23.50) |  |  |
| BMI (kg/m2) | |  |  | 6.70 | 0.035 |
|  | 18.5-23.9 | 27(73.00) | 10(27.00) |  |  |
|  | 24-27.9 | 121(80.70) | 29(19.30) |  |  |
|  | ≥28 | 84(90.30) | 9(9.70) |  |  |
|  |  |  |  |  |  |
| WC (cm) | | 94.10±8.02 | 91.98±6.05 | 1.73 | 0.085 |
| HbA1c (%) | |  |  | 0.02 | 0.904 |
|  | |  |  |  |  |
|  | ＜7 | 122(83.00) | 25(17.00) |  |  |
|  | ≥7 | 108(82.40) | 23(17.60) |  |  |
| SBP (mmHg) | | 137.85±16.98 | 136.15±16.13 | 0.64 | 0.524 |
| DBP (mmHg) | | 82.36±10.86 | 80.52±9.72 | 1.09 | 0.278 |
| FPG (mmol/L) | | 8.20±2.85 | 8.32±5.12 | -0.22 | 0.825 |
| TG (mmol/L) | | 2.14±1.91 | 1.75±1.20 | 1.35 | 0.179 |
| TC (mmol/L) | | 4.94±1.32 | 4.78±1.47 | 0.72 | 0.471 |
| HDL-C (mmol/L) | | 1.17±0.25 | 1.21±0.25 | -0.95 | 0.344 |
| LDL-C (mmol/L) | | 3.11±0.96 | 2.99±1.04 | 0.78 | 0.435 |

GLP-1RA= Glp-1 receptor agonist; SF12= Short Form 12; PSQI= Pittsburgh Sleep Quality Index; BMI=Body mass index; WC= Waist circumference; SBP=Systolic blood pressure; DBP=Diastolic blood pressure; FPG=Fasting plasma glucose; TG= Triglycerides; TC= Total cholesterol; HDL-C= High-density lipoprotein cholesterol; LDL-C= Low-density lipoprotein cholesterol; RMB=Ren Min Bi; IPAQ=International Physical Activity Questionnaire; PA=Physical activity

Statistical test: Independent Two-sample T-test and Chi-square Test

**Supplementary table 3 |** Distribution of participants’ general characteristics according to sleep efficiency

| Variable | | High sleep efficiency  (≥85%) | Low sleep efficiency  (＜85%) | T/χ2 | P |
| --- | --- | --- | --- | --- | --- |
| Gender | |  |  | 2.10 | 0.148 |
|  | Male | 74(44.00) | 94(56.00) |  |  |
|  | Female | 40(35.40) | 73(64.60) |  |  |
| Age | | 46.50±10.96 | 52.24±11.88 | -4.10 | <0.001 |
| Marriage | |  |  | 0.63 | 0.731 |
|  | Unmarried | 8(50.00) | 8(50.00) |  |  |
|  | Married with a spouse | 102(40.00) | 153(60.00) |  |  |
|  | Divorced or widowed | 4(40.00) | 6(60.00) |  |  |
| Education | |  |  | 9.29 | 0.010 |
|  | Junior high school and below | 35(30.20) | 81(69.80) |  |  |
|  | High school or junior college | 42(45.70) | 50(54.30) |  |  |
|  | College and above | 37(50.70) | 36(49.30) |  |  |
| Monthly income | |  |  | 9.46 | 0.009 |
|  | <5000 | 28(28.90) | 69(71.10) |  |  |
|  | 5000-10000 | 41(43.20) | 54(56.80) |  |  |
|  | >10000 | 45(50.60) | 44(49.40) |  |  |
| Smoke | |  |  | 2.88 | 0.090 |
|  | No | 80(37.70) | 132(62.30) |  |  |
|  | Yes | 34(49.30) | 35(50.70) |  |  |
| Drink | |  |  | 0.03 | 0.869 |
|  | No | 74(40.20) | 110(59.80) |  |  |
|  | Yes | 40(41.20) | 57(58.80) |  |  |
| Treatment | |  |  | 7.39 | 0.025 |
|  | Oral medicine | 27(30.00) | 63(70.00) |  |  |
|  | Oral medicine and insulin | 13(37.10) | 22(62.90) |  |  |
|  | Oral medicine and GLP-1RA | 74(47.40) | 82(52.60) |  |  |
| Years of diabetes | |  |  | 1.90 | 0.168 |
|  | ≤5 | 82(43.40) | 107(56.60) |  |  |
|  | ＞5 | 32(34.80) | 60(65.20) |  |  |
| Complications | |  |  | 1.17 | 0.279 |
|  | No | 91(42.30) | 124(57.70) |  |  |
|  | Yes | 23(34.80) | 43(65.20) |  |  |
| Depression (Score) | |  |  | 0.50 | 0.481 |
|  | No | 79(42.00) | 109(58.00) |  |  |
|  | Yes | 35(37.60) | 58(62.40) |  |  |
| Anxiety (Score) | |  |  | 0.00 | 0.970 |
|  | No | 91(40.60) | 133(59.40) |  |  |
|  | Yes | 23(40.40) | 34(59.60) |  |  |
| SF12 (Score) | |  |  | 0.73 | 0.393 |
|  | Good quality of life | 76(42.50) | 103(57.50) |  |  |
|  | Poor quality of life | 38(37.30) | 64(62.70) |  |  |
| PSQI (Score) | | 4.41±2.16 | 8.14±3.05 | -11.99 | <0.001 |
|  | Subjective sleep quality (C1) | 0.75±0.64 | 1.14±0.69 | -4.81 | <0.001 |
|  | Sleep latency (C2) | 0.58±0.93 | 1.10±1.21 | -4.09 | <0.001 |
|  | Sleep duration (C3) | 0.67±0.53 | 1.18±0.72 | -6.49 | <0.001 |
|  | Habitual sleep efficiency (C4) | 0.00±0.00 | 1.79±0.86 | -27.03 | <0.001 |
|  | Sleep disturbances (C5) | 1.05±0.48 | 1.27±0.49 | -3.61 | <0.001 |
|  | Use of sleep medication (C6) | 0.07±0.44 | 0.08±0.38 | -0.16 | 0.876 |
|  | Daytime dysfunction (C7) | 1.30±0.88 | 1.59±0.94 | -2.65 | 0.009 |
| Sleep latency (min) | |  |  | 14.84 | <0.001 |
|  | ≤30 | 101(46.80) | 115(53.20) |  |  |
|  | ＞30 | 13(20.00) | 52(80.00) |  |  |
| Sleep duration (hour) | |  |  | 28.28 | <0.001 |
|  | ≥6 | 111(47.60) | 122(52.40) |  |  |
|  | ＜6 | 3(6.30) | 45(93.80) |  |  |
| IPAQ (Score) | |  |  | 0,340 | 0.844 |
|  | Low PA intensity | 56(39.70) | 85(60.30) |  |  |
|  | Medium PA intensity | 50(40.70) | 73(59.30) |  |  |
|  | High PA intensity | 8(47.10) | 9(52.90) |  |  |
| BMI (kg/m2) | |  |  | 10.35 | 0.006 |
|  | 18.5-23.9 | 9(24.30) | 28(75.70) |  |  |
|  | 24-27.9 | 56(37.30) | 94(62.70) |  |  |
|  | ≥28 | 49(52.70) | 44(47.30) |  |  |
| WC (cm) | | 94.57±7.74 | 93.16±7.73 | 1.51 | 0.133 |
| HbA1c (%) | |  |  | 0.00 | 0.956 |
|  | ＜7 | 59(40.10) | 88(59.90) |  |  |
|  | ≥7 | 53(40.50) | 78(59.50) |  |  |
| SBP (mmHg) | | 137.55±15.15 | 137.56±17.92 | -0.00 | 0.997 |
| DBP (mmHg) | | 83.31±10.44 | 81.18±10.79 | 1.64 | 0.102 |
| FPG (mmol/L) | | 8.15±2.65 | 8.27±3.75 | -0.30 | 0.764 |
| TG (mmol/L) | | 2.20±1.78 | 1.98±1.83 | 0.95 | 0.341 |
| TC (mmol/L) | | 5.03±1.41 | 4.82±1.30 | 1.27 | 0.206 |
| HDL-C (mmol/L) | | 1.15±0.20 | 1.19±0.27 | -1.49 | 0.139 |
| LDL-C (mmol/L) | | 3.18±1.02 | 3.03±0.93 | 1.31 | 0.191 |

GLP-1RA= Glp-1 receptor agonist; SF12= Short Form 12; PSQI= Pittsburgh Sleep Quality Index; BMI=Body mass index; WC= Waist circumference; SBP=Systolic blood pressure; DBP=Diastolic blood pressure; FPG=Fasting plasma glucose; TG= Triglycerides; TC= Total cholesterol; HDL-C= High-density lipoprotein cholesterol; LDL-C= Low-density lipoprotein cholesterol; RMB=Ren Min Bi; IPAQ=International Physical Activity Questionnaire; PA=Physical activity

Statistical test: Independent Two-sample T-test and Chi-square Test
